# Supplementary material for: Effects of larval foam-making and prolonged terrestriality on morphology, nitrogen excretion and development to metamorphosis in a Leptodactylid frog
Source: PeerJ journal article supplement (doi:10.7717/peerj.18990), 2025-02-26

A) 14.5 d, 1 nest constructed

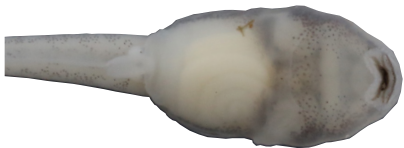

B) 18.5 d, 3 nests constructed

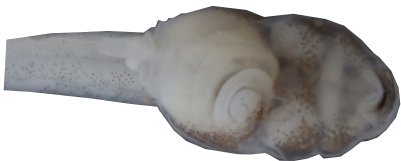

C) 14.5 d, 2 d in water, unfed

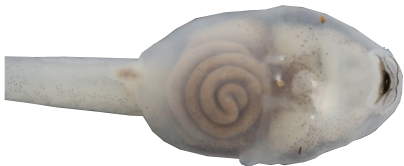

Supplement: Figure_S1.pdf [file Figure_S1.pdf]
