# Supplementary material for: Effects of larval foam-making and prolonged terrestriality on morphology, nitrogen excretion and development to metamorphosis in a Leptodactylid frog
Source: PeerJ. 2025 Feb 26;13:e18990. doi: 10.7717/peerj.18990 (PMC11871897; doi:10.7717/peerj.18990)
Supplement: Supplemental Information 5 — Data that were used to test larval foam making ability, nitrogen excretion in larval nest, arginase activity of larval tissues in larval nests, short term effect on larval size and carry over effect on larval development and metamorphosis. [file peerj-13-18990-s005.xlsx]

## Sheet: Larval foam-making ability acro
Foam making ability across ages
Nest ID	Age at transfer (days)	Number of tadpoles	Larval nest #	Foam volume (mm3)	Year	Volume (mm3) per larva
L.fragilis_25	4.5	105	First	8566.3	2018	81.58
L.fragilis_30	4.5	76	First	3398.5	2018	44.72
L.fragilis_33	4.5	90	First	4376	2018	48.62
L.fragilis_34	4.5	58	First	4804.6	2018	82.84
L.fragilis_39	4.5	85	First	5512.8	2018	64.86
L.fragilis_42	4.5	59	First	4935.9	2018	83.66
L.fragilis_44	4.5	52	First	3210.7	2018	61.74
L.fragilis_52	4.5	77	First	3765.1	2018	48.9
L.fragilis_57	4.5	76	First	4684	2017	61.63
L.fragilis_62	4.5	89	First	9876.1	2017	110.97
L.fragilis_67	4.5	91	First	6695.7	2017	73.58
L.fragilis_68	4.5	96	First	5990.1	2017	62.4
L.fragilis_81	4.5	70	First	6325.9	2017	90.37
L.fragilis_84	4.5	63	First	6055.7	2017	96.12
L.fragilis_57	4.5	76	Second	4625.9	2017	60.87
L.fragilis_62	4.5	89	Second	6549.2	2017	73.59
L.fragilis_67	4.5	91	Second	7965.1	2017	87.53
L.fragilis_68	4.5	96	Second	7900.3	2017	82.29
L.fragilis_81	4.5	70	Second	7283	2017	104.04
L.fragilis_84	4.5	63	Second	7102.4	2017	112.74
L.fragilis_54	8.5	107	First	7801.8	2017	72.91
L.fragilis_56	8.5	72	First	6233.5	2017	86.58
L.fragilis_64	8.5	58	First	4800.3	2017	82.76
L.fragilis_73	8.5	79	First	7429.5	2017	94.04
L.fragilis_75	8.5	67	First	6161.4	2017	91.96
L.fragilis_87	8.5	98	First	8607.7	2017	87.83
L.fragilis_88	8.5	127	First	6558	2017	51.64
L.fragilis_89	8.5	51	First	4720.2	2017	92.55
L.fragilis_54	8.5	107	Second	8570.5	2017	80.1
L.fragilis_56	8.5	72	Second	4346	2017	60.36
L.fragilis_64	8.5	58	Second	3823.2	2017	65.92
L.fragilis_73	8.5	79	Second	6360.9	2017	80.52
L.fragilis_75	8.5	67	Second	6549.6	2017	97.75
L.fragilis_87	8.5	98	Second	8629	2017	88.05
L.fragilis_88	8.5	127	Second	6544.2	2017	51.53
L.fragilis_89	8.5	51	Second	4619.5	2017	90.58
L.fragilis_54	8.5	107	Third	10031.2	2017	93.75
L.fragilis_56	8.5	72	Third	5657.7	2017	78.58
L.fragilis_75	8.5	67	Third	4628.7	2017	69.09
L.fragilis_87	8.5	98	Third	7684.3	2017	78.41
L.fragilis_89	8.5	51	Third	4005.9	2017	78.55
L.fragilis_03	12.5	90	First	8108.8	2017	90.1
L.fragilis_04	12.5	93	First	6383.9	2017	68.64
L.fragilis_05	12.5	84	First	6338.1	2018	75.45
L.fragilis_10	12.5	100	First	5566.8	2018	55.67
L.fragilis_15	12.5	39	First	4755.7	2017	121.94
L.fragilis_16	12.5	109	First	7847.9	2017	72
L.fragilis_17	12.5	83	First	5634	2017	67.88
L.fragilis_18	12.5	79	First	5605.4	2017	70.95
L.fragilis_19	12.5	77	First	5754.8	2017	74.74
L.fragilis_20	12.5	69	First	8072.9	2017	117
L.fragilis_21	12.5	67	First	7350.7	2017	109.71
L.fragilis_22	12.5	67	First	8067.4	2017	120.41
L.fragilis_23	12.5	79	First	6869.1	2017	86.95
L.fragilis_24	12.5	39	First	4830.9	2017	123.87
L.fragilis_26	12.5	83	First	7542.2	2017	90.87
L.fragilis_28	12.5	85	First	7564.5	2017	88.99
L.fragilis_30	12.5	101	First	6264.3	2017	62.02
L.fragilis_37	12.5	72	First	5207	2017	72.32
L.fragilis_38	12.5	87	First	7594.4	2017	87.29
L.fragilis_54	12.5	52	First	3976.5	2018	76.47
L.fragilis_57	12.5	57	First	4964.3	2018	87.09
L.fragilis_59	12.5	119	First	4721	2018	39.67
L.fragilis_15	12.5	37	Second	4209.2	2017	113.76
L.fragilis_16	12.5	107	Second	6143.7	2017	57.42
L.fragilis_17	12.5	81	Second	5228.2	2017	64.55
L.fragilis_18	12.5	77	Second	6501.1	2017	84.43
L.fragilis_19	12.5	75	Second	7682	2017	102.43
L.fragilis_20	12.5	67	Second	7078.8	2017	105.65
L.fragilis_21	12.5	65	Second	6956	2017	107.01
L.fragilis_22	12.5	65	Second	5627.4	2017	86.57
L.fragilis_23	12.5	77	Second	5816.5	2017	75.54
L.fragilis_24	12.5	37	Second	5002.5	2017	135.2
L.fragilis_26	12.5	81	Second	7318.8	2017	90.35
L.fragilis_28	12.5	83	Second	8207	2017	98.88
L.fragilis_30	12.5	99	Second	5496.1	2017	55.52
L.fragilis_37	12.5	70	Second	4898.9	2017	69.98
L.fragilis_38	12.5	85	Second	7703.5	2017	90.63
L.fragilis_15	12.5	35	Third	4755.7	2017	135.88
L.fragilis_16	12.5	105	Third	7847.9	2017	74.74
L.fragilis_17	12.5	79	Third	5634	2017	71.32
L.fragilis_18	12.5	75	Third	5605.4	2017	74.74
L.fragilis_19	12.5	73	Third	8067.4	2017	110.51
L.fragilis_20	12.5	65	Third	5207	2017	80.11
L.fragilis_21	12.5	63	Third	7594.4	2017	120.55
L.fragilis_22	12.5	63	Third	8067.4	2017	128.05
L.fragilis_23	12.5	75	Third	6869.1	2017	91.59
L.fragilis_24	12.5	35	Third	4830.9	2017	138.03
L.fragilis_26	12.5	79	Third	7542.2	2017	95.47
L.fragilis_28	12.5	81	Third	7564.5	2017	93.39
L.fragilis_30	12.5	97	Third	6264.3	2017	64.58
L.fragilis_37	12.5	68	Third	5207	2017	76.57
L.fragilis_38	12.5	83	Third	7594.4	2017	91.5

## Sheet: N excretion in larval nests
Nitrogen excretion in larval nests
Year	Nest ID	Soil moisture treatment	Age in parental nest (days)	Larval nest #	Ammonia (g/l)	Urea (g/l)	Number of tadpoles	Water volume in nest (ml)	Water per larva (L)	Ammonia (mmol/L)	Urea (mmol/L)	Urea N (mmol/L)	Total NH3 (mmol/L) (predicted ammonia)	Ammonia (µmol) per larva	Urea N (µmol) per larva	Total N-wastes (µmol) per larva
2017	L. fragilis_3	Wet	12.5	First	2.60073	0	93	0.026	2.7957e-07	152.715	0	0	152.715	0.0426945	0	0.0426945
2017	L. fragilis_4	Wet	12.5	First	1.83759	NA	96	0.026	2.70833e-07	107.903	NA	NA	NA	0.0292238	NA	NA
2017	L. fragilis_21	Wet	12.5	Third	2.85506	18.5862	70	0.026	3.71429e-07	167.649	309.485	618.969	786.618	0.0622695	0.229903	0.292172
2017	L. fragilis_23	Wet	12.5	Third	3.13436	NA	82	0.026	3.17073e-07	184.049	NA	NA	NA	0.058357	NA	NA
2017	L. fragilis_19	Wet	12.5	Third	3.75724	14.7165	80	0.026	3.25e-07	220.625	245.049	490.099	710.723	0.071703	0.159282	0.230985
2017	L. fragilis_17	Wet	12.5	Third	2.39399	12.3126	86	0.026	3.02326e-07	140.575	205.021	410.043	550.618	0.0424994	0.123966	0.166466
2017	L. fragilis_22	Dry	12.5	Third	2.70099	10.4328	70	0.0165	2.35714e-07	158.602	173.721	347.441	506.043	0.0373848	0.0818969	0.119282
2017	L. fragilis_18	Dry	12.5	Third	3.80711	25.4924	82	0.0165	2.0122e-07	223.553	424.483	848.965	1072.52	0.0449833	0.170828	0.215812
2018	L. fragilis_1	Wet	12.5	First	1.88965	8.07014	80	0.025	3.125e-07	110.96	134.379	268.757	379.717	0.034675	0.0839866	0.118662
2018	L. fragilis_2	Wet	12.5	First	2.78529	6.81032	80	0.025	3.125e-07	163.552	113.401	226.802	390.354	0.05111	0.0708756	0.121986
2018	L. fragilis_3	Dry	12.5	First	3.64075	9.94639	97	0.02	2.06186e-07	213.784	165.621	331.241	545.026	0.0440793	0.0682972	0.112376
2018	L. fragilis_7	Dry	12.5	First	3.19729	6.70551	109	0.018	1.65138e-07	187.744	111.656	223.311	411.056	0.0310037	0.0368771	0.0678807
2018	L. fragilis_9	Dry	12.5	First	2.50675	8.54869	63	0.018	2.85714e-07	147.196	142.347	284.694	431.89	0.042056	0.0813412	0.123397
2018	L. fragilis_5	Dry	12.5	First	6.01664	49.6717	84	0.012	1.42857e-07	353.296	827.1	1654.2	2007.5	0.0504709	0.236314	0.286785
2018	L. fragilis_10	Wet	12.5	First	3.28841	5.45273	100	0.026	2.6e-07	193.095	90.7952	181.59	374.686	0.0502048	0.0472135	0.0974183
2018	L. fragilis_32	Dry	12.5	First	2.59295	12.846	96	0.0165	1.71875e-07	152.258	213.903	427.806	580.064	0.0261693	0.0735292	0.0996985
2018	L. fragilis_12	Wet	12.5	First	2.41846	1.74588	84	0.018	2.14286e-07	142.012	29.0712	58.1424	200.154	0.0304311	0.0124591	0.0428902
2018	L. fragilis_13	Wet	12.5	First	1.90518	3.94378	111	0.025	2.25225e-07	111.872	65.6692	131.338	243.21	0.0251964	0.0295807	0.0547771
2018	L. fragilis_41	Dry	12.5	First	8.70384	26.7917	78	0.011	1.41026e-07	511.088	446.117	892.234	1403.32	0.0720766	0.125828	0.197904
2018	L. fragilis_19	Wet	12.5	First	0.352364	1.60549	100	0.018	1.8e-07	20.6908	26.7335	53.4669	74.1577	0.00372434	0.00962405	0.0133484
2018	L. fragilis_20	Wet	12.5	First	0.390542	1.35427	83	0.023	2.77108e-07	22.9326	22.5503	45.1007	68.0333	0.00635482	0.0124978	0.0188526
2018	L. fragilis_51	Wet	12.5	First	0.354297	3.21611	89	0.032	3.59551e-07	20.8043	53.5526	107.105	127.909	0.0074802	0.0385097	0.0459899
2018	L. fragilis_61	Wet	12.5	First	0.542647	1.48848	77	0.035	4.54545e-07	31.8642	24.7852	49.5704	81.4346	0.0144837	0.022532	0.0370157
2018	L. fragilis_57	Dry	12.5	First	1.10034	4.68657	57	0.015	2.63158e-07	64.6121	78.0377	156.075	220.687	0.0170032	0.0410724	0.0580756
2018	L. fragilis_59	Dry	12.5	First	1.38813	4.08956	119	0.015	1.2605e-07	81.5106	68.0965	136.193	217.704	0.0102744	0.0171672	0.0274416
2018	L. fragilis_37	Wet	12.5	First	0.294655	NA	90	0.033	3.66667e-07	17.3021	NA	NA	NA	0.00634411	NA	NA
2018	L. fragilis_54	Dry	12.5	First	0.857704	1.44776	52	0.015	2.88462e-07	50.3643	24.1072	48.2143	98.5786	0.0145282	0.013908	0.0284361
2018	L. fragilis_25	Wet	4.5	First	0.953165	0	105	0.02	1.90476e-07	55.9698	0	0	55.9698	0.0106609	0	0.0106609
2018	L. fragilis_30	Wet	4.5	First	2.63004	0	76	0.00925	1.21711e-07	154.436	0	0	154.436	0.0187964	0	0.0187964
2018	L. fragilis_33	Wet	4.5	First	0.569976	0	90	0.008	8.88889e-08	33.469	0	0	33.469	0.00297502	0	0.00297502
2018	L. fragilis_34	Wet	4.5	First	2.92285	0	58	0.004	6.89655e-08	171.63	0	0	171.63	0.0118365	0	0.0118365
2018	L. fragilis_42	Wet	4.5	First	4.47891	0	59	0.00925	1.5678e-07	263.001	0	0	263.001	0.0412332	0	0.0412332
2018	L. fragilis_52	Wet	4.5	First	1.36347	0	77	0.005	6.49351e-08	80.063	0	0	80.063	0.0051989	0	0.0051989

## Sheet: Arginase activity
Arginase activity in larval tissues
Nest ID	Soil moisture treatment	Age (days)	Arginase (µmol/min/mg wet tissue)	Arginase (µmol/min/mg protein)	Urea (µmol/mg wet tissue)
L. fragilis 21	Wet	14	0.00142	0.04289	0.2002
L. fragilis 3	Dry	15	0.00267	0.07669	0.2087
L. fragilis 3	Dry	15	0.00327	0.07091	0.2098
L. fragilis 1	Wet	14	0.00342	0.10264	0.2105
L. fragilis 10	Wet	14	0.00326	0.08569	0.2042
L. fragilis 09	Dry	15	0.00272	0.08509	0.221
L. fragilis 20	Wet	14	0.00187	0.06574	0.1985
L. fragilis 7	Dry	15	0.00549	0.17737	0.2302
L. fragilis 33	Wet	14	0.00592	0.1508	0.2787
L. fragilis 32	Dry	14	0.00449	0.12182	0.2316
L. fragilis 5	Dry	14	0.00288	0.07229	0.2217
L. fragilis 19	Wet	14	0.00245	0.07657	0.2063

## Sheet: Larval morphology
Larval morphology after 2 days developing in water vs. on land making a new foam nest (sibship mean values)																		Morphology of terrestrial larvae after making 1–3 larval foam nests (sibship mean values)
Nest ID	Soil moisture treatment	Number of tadpoles	Larval treatment	Sibship	Total Length (TL, mm)	Tail Length (TAL, mm)	Tail Muscle Width (TMW, mm	Interorbital Distance (IOD, mm)	Head Width (HW, mm)	Tail Muscle Height (TMH, mm)	Tail Height (TH, mm)	PC1	PC2	PC3	PC4	PC5		Nest ID	Soil moisture treatment	Number of tadpoles	Larval nest #	Sibship	Total Length (TL, mm)	Tail Length (TAL, mm)	Tail Muscle Width (TMW, mm	Interorbital Distance (IOD, mm)	Head Width (HW, mm)	Tail Muscle Height (TMH, mm)	Tail Height (TH, mm)	PC1	PC2	PC3	PC4	PC5
L.fragilis_03	Wet	93	Water	1	1.30667	0.907	0.096	0.068	0.223667	0.104	0.218667	1.14934	-0.446576	-0.174214	-0.19157	-0.43236		L.fragilis_03	Wet	93	First	1	1.148	0.765	0.0933333	0.0675	0.186833	0.105333	0.176	0.25769	0.371878	0.766453	-0.0151501	-0.393643
L.fragilis_04	Wet	96	Water	2	1.15067	0.776333	0.0786667	0.061	0.200667	0.0896667	0.186667	-1.92827	-1.46576	-1.09152	-0.264624	-0.128731		L.fragilis_04	Wet	96	First	2	1.08383	0.743167	0.0818333	0.063	0.174167	0.0858333	0.161	-2.13869	-1.17132	0.452862	-0.640298	-0.0813534
L.fragilis_08	Wet	111	Water	4	1.30867	0.883667	0.097	0.07	0.224	0.103333	0.215	1.12714	-0.450248	-0.0645952	-0.0404405	-0.168356		L.fragilis_08	Wet	111	First	3	1.1505	0.791833	0.0973333	0.0635	0.182	0.0978333	0.163333	-0.200869	-0.164595	-0.331918	0.0984698	-0.241928
L.fragilis_10	Wet	62	Water	5	1.36433	0.925	0.0976667	0.073	0.248	0.109	0.252333	2.55454	-0.28626	-0.645066	-0.232643	0.00499062		L.fragilis_10	Wet	62	First	4	1.24283	0.854	0.102333	0.0715	0.196	0.105333	0.205333	2.83375	-0.081908	0.624842	-0.375686	0.014052
L.fragilis_12	Wet	90	Water	6	1.281	0.837	0.089	0.075	0.217	0.101	0.205	0.556032	-0.758029	-0.65049	0.749869	0.182964		L.fragilis_12	Wet	90	First	5	1.1845	0.791	0.097	0.068	0.1905	0.102	0.1895	1.10363	0.0664135	0.509638	-0.456775	-0.199386
L.fragilis_16	Wet	112	Water	8	1.17	0.77	0.103	0.056	0.217	0.112	0.193	-0.722554	1.115	0.415504	-1.44236	0.21522		L.fragilis_15	Wet	42	First	6	1.1155	0.726	0.093	0.058	0.189	0.106	0.154	-0.200869	-0.164595	-0.331918	0.0984698	-0.241928
L.fragilis_17	Wet	86	Water	9	1.259	0.812	0.094	0.064	0.235	0.12	0.224	0.679958	1.17741	-0.994563	-0.724776	0.130995		L.fragilis_16	Wet	112	First	7	1.065	0.7035	0.0835	0.0575	0.171	0.1335	0.118	-2.68323	2.8766	0.831859	2.90987	0.148299
L.fragilis_18	Dry	82	Water	10	1.103	0.74	0.086	0.06	0.174	0.087	0.153	-2.87848	-1.23554	0.148842	0.00738871	-0.0310629		L.fragilis_17	Wet	86	First	8	1.1035	0.729	0.092	0.0615	0.186	0.107	0.186	-0.520588	1.22612	0.481843	-0.656397	0.185026
L.fragilis_19	Wet	80	Water	11	1.452	0.941	0.119	0.085	0.284	0.12	0.256	4.97875	0.860777	0.71828	-0.0257002	0.925431		L.fragilis_18	Dry	82	First	9	0.9695	0.607	0.087	0.0485	0.1715	0.0955	0.115	-5.10595	1.37681	-1.44484	0.0575914	-0.623446
L.fragilis_20	Wet	72	Water	12	1.419	0.937	0.099	0.08	0.263	0.121	0.247	3.57166	0.633915	-0.873828	0.369808	0.0247644		L.fragilis_19	Wet	80	First	10	1.405	0.9545	0.119	0.0675	0.222	0.0975	0.1755	5.06543	-0.999842	-2.57603	0.65967	-0.197518
L.fragilis_21	Wet	70	Water	13	1.329	0.858	0.092	0.07	0.256	0.101	0.216	1.29169	-0.765544	-0.794259	-0.549264	-0.0117692		L.fragilis_20	Wet	72	First	11	1.2215	0.812	0.1065	0.068	0.186	0.11	0.17	1.51324	0.560535	-0.0560765	0.778002	-0.579536
L.fragilis_22	Dry	70	Water	14	1.368	0.883	0.098	0.07	0.237	0.107	0.233	1.80358	-0.235499	-0.336907	-0.349014	-0.107981		L.fragilis_21	Wet	70	First	12	1.2595	0.8425	0.0995	0.0735	0.196	0.104	0.1935	2.63619	-0.471774	0.810286	0.0171032	-0.329685
L.fragilis_23	Wet	82	Water	15	1.43	0.933	0.092	0.072	0.259	0.108	0.243	2.61716	-0.533667	-1.13855	-0.353569	-0.550781		L.fragilis_22	Dry	70	First	13	1.209	0.8065	0.092	0.0675	0.1915	0.096	0.1755	0.763566	-0.799849	0.242001	-0.108983	-0.0789933
L.fragilis_03	Wet	90	First larval nest	1	1.148	0.765	0.0933333	0.0675	0.186833	0.105333	0.176	-1.20972	0.241575	0.0948376	0.506857	0.388281		L.fragilis_23	Wet	82	First	14	1.2445	0.838	0.092	0.068	0.182	0.1135	0.175	1.19057	0.14176	0.983514	1.22165	0.583499
L.fragilis_04	Wet	93	First larval nest	2	1.08383	0.743167	0.0818333	0.063	0.174167	0.0858333	0.161	-2.82954	-1.50834	-0.282376	0.370195	0.160207		L.fragilis_03	Wet	93	Second	1	1.17103	0.787	0.079	0.063	0.185	0.093	0.176	-0.727318	-1.01716	0.608776	-0.345589	0.867718
L.fragilis_08	Wet	108	First larval nest	4	1.1505	0.791833	0.0973333	0.0635	0.182	0.0978333	0.163333	-1.48197	-0.261114	0.832219	0.0958196	-0.0170608		L.fragilis_04	Wet	96	Second	2	1.06417	0.730167	0.0773333	0.058	0.1645	0.0823333	0.141333	-3.62593	-1.41016	-0.015835	-0.209336	0.270023
L.fragilis_10	Wet	59	First larval nest	5	1.24283	0.854	0.102333	0.0715	0.196	0.105333	0.205333	0.550366	0.00552584	0.677599	0.50981	0.252663		L.fragilis_08	Wet	111	Second	3	1.19167	0.8105	0.0986667	0.0595	0.186667	0.0928333	0.159667	-0.0816187	-0.507502	-1.32012	0.058586	0.186456
L.fragilis_12	Wet	87	First larval nest	6	1.1845	0.791	0.097	0.068	0.1905	0.102	0.1895	-0.654408	-0.113386	0.384827	0.33133	0.405798		L.fragilis_10	Wet	62	Second	4	1.192	0.809667	0.106667	0.064	0.196	0.111667	0.212	2.17453	1.4588	-0.0564707	-0.829626	0.407651
L.fragilis_16	Wet	39	First larval nest	8	1.065	0.7035	0.0835	0.0575	0.171	0.1335	0.118	-3.07012	3.08117	-0.857939	0.532243	-0.698232		L.fragilis_12	Wet	90	Second	5	1.1625	0.7965	0.1005	0.06	0.1955	0.1155	0.188	1.04715	1.78457	-0.324718	-0.00248133	0.611049
L.fragilis_17	Wet	83	First larval nest	9	1.1035	0.729	0.092	0.0615	0.186	0.107	0.186	-1.79426	0.518093	-0.193231	-0.1402	0.553247		L.fragilis_15	Wet	42	Second	6	1.0965	0.7205	0.0955	0.064	0.188	0.103	0.1695	-0.57078	0.850431	0.18396	-0.415507	-0.737893
L.fragilis_18	Dry	79	First larval nest	10	0.9695	0.607	0.087	0.0485	0.1715	0.0955	0.115	-4.96077	0.255942	0.257191	-1.04532	0.300792		L.fragilis_16	Wet	112	Second	7	1.0345	0.6855	0.0875	0.0535	0.169	0.097	0.151	-3.33297	0.79825	-0.486905	-0.333559	0.230275
L.fragilis_19	Wet	77	First larval nest	11	1.405	0.9545	0.119	0.0675	0.222	0.0975	0.1755	1.84143	-0.456245	2.56872	-0.584601	-0.957539		L.fragilis_17	Wet	86	Second	8	1.0545	0.694	0.0915	0.0605	0.1815	0.0975	0.173	-1.6729	0.742154	0.129178	-1.01505	-0.392805
L.fragilis_20	Wet	69	First larval nest	12	1.2215	0.812	0.1065	0.068	0.186	0.11	0.17	-0.250828	0.8276	1.31961	0.392407	0.0638806		L.fragilis_18	Dry	82	Second	9	1.106	0.748	0.086	0.059	0.173	0.087	0.151	-2.28198	-0.90575	-0.395908	-0.244459	0.116125
L.fragilis_21	Wet	67	First larval nest	13	1.2595	0.8425	0.0995	0.0735	0.196	0.104	0.1935	0.411834	-0.150794	0.544465	0.80824	0.176928		L.fragilis_19	Wet	80	Second	10	1.2355	0.8405	0.1005	0.0675	0.191	0.099	0.18	1.60988	-0.547288	-0.182104	0.0612016	-0.0536702
L.fragilis_22	Dry	67	First larval nest	14	1.209	0.8065	0.092	0.0675	0.1915	0.096	0.1755	-0.919514	-0.746988	0.206768	0.402806	-0.0675543		L.fragilis_20	Wet	72	Second	11	1.242	0.829	0.107	0.0655	0.1955	0.1055	0.181	2.01794	0.383914	-0.660042	0.168473	-0.145306
L.fragilis_23	Wet	79	First larval nest	15	1.2445	0.838	0.092	0.068	0.182	0.1135	0.175	-0.433034	0.696976	-0.0713339	0.867306	-0.614736		L.fragilis_21	Wet	70	Second	12	1.2465	0.8325	0.098	0.0705	0.1985	0.101	0.191	2.21579	-0.473642	0.380033	-0.213844	-0.153439
																		L.fragilis_22	Dry	70	Second	13	1.233	0.832	0.092	0.0655	0.195	0.0995	0.1645	0.931791	-0.680221	-0.213257	0.559659	0.198836
																		L.fragilis_23	Wet	82	Second	14	1.27	0.863	0.0955	0.0685	0.18	0.097	0.175	1.26559	-1.32018	0.247267	0.57373	0.365683
																		L.fragilis_03	Wet	93	Third	1	1.16667	0.786667	0.0833333	0.06	0.182333	0.0956667	0.170333	-0.915376	-0.550347	0.0695403	-0.103062	0.948945
																		L.fragilis_04	Wet	96	Third	2	1.07333	0.747167	0.079	0.059	0.165333	0.0821667	0.147833	-3.18727	-1.49784	0.0308309	-0.333051	0.321543
																		L.fragilis_08	Wet	111	Third	3	1.11333	0.752333	0.0943333	0.062	0.188667	0.106	0.173333	-0.312845	0.962163	0.0622855	-0.2046	-0.0830999
																		L.fragilis_10	Wet	62	Third	4	1.1645	0.790333	0.105667	0.065	0.198333	0.1135	0.204	1.9208	1.68152	0.0911602	-0.668044	-0.0185257
																		L.fragilis_12	Wet	90	Third	5	1.1215	0.7495	0.105	0.057	0.1935	0.1095	0.2	0.509808	2.10307	-0.768831	-1.14662	0.433323
																		L.fragilis_15	Wet	42	Third	6	1.076	0.7025	0.091	0.062	0.1875	0.103	0.172	-1.10693	1.00675	0.319699	-0.629242	-0.423175
																		L.fragilis_16	Wet	112	Third	7	1.0645	0.7145	0.0815	0.057	0.165	0.09	0.1505	-3.29342	-0.456763	0.0324425	-0.255005	0.355466
																		L.fragilis_17	Wet	86	Third	8	1.105	0.7455	0.0805	0.0645	0.1755	0.0875	0.148	-2.10102	-1.337	0.508062	-0.0174735	-0.32884
																		L.fragilis_18	Dry	82	Third	9	1.0985	0.745	0.0825	0.061	0.169	0.0855	0.1095	-3.22069	-1.55863	-0.503832	1.11982	-0.704141
																		L.fragilis_19	Wet	80	Third	10	1.225	0.8295	0.099	0.0695	0.1915	0.0995	0.1755	1.51216	-0.601269	0.122843	0.187247	-0.39076
																		L.fragilis_20	Wet	72	Third	11	1.22	0.8195	0.093	0.0655	0.1955	0.105	0.1695	1.03811	-0.0591035	0.0191099	0.555839	0.196918
																		L.fragilis_21	Wet	70	Third	12	1.221	0.819	0.0985	0.075	0.201	0.1015	0.192	2.45183	-0.480483	0.932243	-0.345305	-0.861066
																		L.fragilis_22	Dry	70	Third	13	1.27	0.8585	0.097	0.0635	0.198	0.102	0.182	1.82575	-0.323051	-0.581511	0.245955	0.786971
																		L.fragilis_23	Wet	82	Third	14	1.241	0.826	0.092	0.0705	0.1895	0.1005	0.182	1.39605	-0.81145	0.809583	0.193808	0.0322746

## Sheet: Metamorph size and timing
Carry-over effect of larval nest construction on metamorphic size and timing
Nest ID	Year	Sibling within treatment	Larval nest #	Number of tadpoles	Total length at forelimb emergence (mm)	Aquatic larval period to forelimb emergence (days)	Age at forelimb emergence (days from oviposition)	Mass at forelimb emergence (mg)	Aquatic larval + metamorphic period (days)	Age at tail resorption (days from oviposition)	SVL (mm) at tail resorption	Mass (mg) at tail resorption
L.fragilis_03	2017	A	none	93	36.805	19	31	0.329	25	37	11.8	0.192
L.fragilis_04	2017	A	none	96	43.376	23	35	0.483	NA	NA	NA	NA
L.fragilis_08	2017	A	none	111	39.163	17	29	0.421	23	35	12.4	0.236
L.fragilis_10	2017	A	none	62	42.642	20	32	0.454	26	38	13	0.302
L.fragilis_12	2017	A	none	90	45.108	18	30	0.466	23	35	12.8	0.309
L.fragilis_15	2017	A	none	42	39.699	17	29	0.236	NA	NA	NA	NA
L.fragilis_16	2017	A	none	112	31.247	20	32	0.205	NA	NA	NA	NA
L.fragilis_17	2017	A	none	86	35.867	21	33	0.259	28	40	11.2	0.167
L.fragilis_18	2017	A	none	82	NA	19	31	0.262	25	37	11.7	0.16
L.fragilis_19	2017	A	none	80	32.102	20	32	0.194	26	38	9.1	0.111
L.fragilis_20	2017	A	none	72	37.057	17	29	0.276	22	34	11.3	0.17
L.fragilis_21	2017	A	none	70	33.199	21	33	0.219	30	42	10.8	0.132
L.fragilis_22	2017	A	none	70	28.932	20	32	0.25	NA	NA	NA	NA
L.fragilis_23	2017	A	none	82	31.98	22	34	0.185	27	39	10.2	0.118
L.fragilis_24	2017	A	none	42	38.057	23	35	0.291	29	41	12.5	0.187
L.fragilis_28	2017	A	none	88	41.193	16	28	0.366	28	40	12.4	0.223
L.fragilis_30	2017	A	none	104	38.2	18	30	0.317	24	36	12.8	0.21
L.fragilis_37	2017	A	none	75	40.636	15	27	0.351	24	36	11.8	NA
L.fragilis_38	2017	A	none	90	38.902	17	29	0.316	NA	NA	NA	NA
L.fragilis_39	2018	A	none	100	40	16	28	0.441	24	36	13.4	0.259
L.fragilis_39	2018	B	none	100	39.818	17	29	0.397	24	36	13.1	0.26
L.fragilis_40	2018	A	none	83	39.227	17	29	0.364	24	36	12.8	0.226
L.fragilis_40	2018	B	none	83	39.009	17	29	0.412	24	36	14.1	0.261
L.fragilis_41	2018	A	none	82	42.12	17	29	0.397	24	36	13.8	0.28
L.fragilis_41	2018	B	none	82	42.711	17	29	0.442	24	36	13.8	0.291
L.fragilis_42	2018	A	none	52	35.582	16	28	0.269	21	33	11.2	0.193
L.fragilis_42	2018	B	none	52	35.039	16	28	0.313	22	34	12.2	0.189
L.fragilis_43	2018	A	none	57	38.631	17	29	0.289	24	36	10.8	0.166
L.fragilis_43	2018	B	none	57	36.135	15	27	0.296	NA	NA	NA	NA
L.fragilis_44	2018	B	none	119	40.711	20	32	0.294	29	41	12.3	0.184
L.fragilis_03	2017	A	first	90	42.004	17	31	0.491	25	39	12.9	0.297
L.fragilis_03	2017	B	first	90	44.449	18	32	0.454	NA	NA	NA	NA
L.fragilis_04	2017	A	first	93	43.681	18	32	0.441	NA	NA	NA	NA
L.fragilis_04	2017	B	first	93	39.541	19	33	0.34	NA	NA	NA	NA
L.fragilis_06	2017	A	first	120	42.084	18	32	0.414	25	39	12.9	0.27
L.fragilis_06	2017	B	first	120	38.937	19	33	0.372	25	39	12.3	0.242
L.fragilis_08	2017	A	first	108	43.96	15	29	0.487	23	37	13.1	0.297
L.fragilis_08	2017	B	first	108	42.835	16	30	0.412	24	38	13.3	0.258
L.fragilis_10	2017	A	first	59	41.823	17	31	0.418	22	36	12.4	0.28
L.fragilis_10	2017	B	first	59	42.838	18	32	0.423	30	44	12.8	0.26
L.fragilis_12	2017	A	first	87	40.741	16	30	0.403	21	35	13.2	0.271
L.fragilis_12	2017	B	first	87	42.976	18	32	0.44	24	38	12.9	0.281
L.fragilis_15	2017	A	first	39	33.71	22	36	0.228	30	44	10.02	0.125
L.fragilis_17	2017	A	first	83	34.335	18	32	0.272	24	38	11	0.161
L.fragilis_18	2017	A	first	79	34.817	17	31	0.239	22	36	11.1	0.149
L.fragilis_18	2017	B	first	79	36.368	17	31	0.256	NA	NA	NA	NA
L.fragilis_19	2017	A	first	77	30.226	15	29	0.225	21	35	10.7	0.156
L.fragilis_19	2017	B	first	77	28.314	19	33	0.212	27	41	10.02	0.144
L.fragilis_20	2017	A	first	69	34.064	15	29	0.263	20	34	10.3	0.16
L.fragilis_20	2017	B	first	69	34.873	18	32	0.309	24	38	11.2	0.204
L.fragilis_21	2017	A	first	67	35.583	21	35	0.268	NA	NA	NA	NA
L.fragilis_21	2017	B	first	67	34.284	21	35	0.247	32	46
L.fragilis_22	2017	A	first	67	34.931	15	29	0.268	NA	NA	NA	NA
L.fragilis_22	2017	B	first	67	35.032	17	31	0.261	NA	NA	NA	NA
L.fragilis_23	2017	A	first	79	33.227	18	32	0.298	25	39	11.7	0.201
L.fragilis_23	2017	B	first	79	36.038	20	34	0.303	NA	NA	NA	NA
L.fragilis_24	2017	A	first	39	34.575	19	33	0.268	27	41	11.2	0.194
L.fragilis_24	2017	B	first	39	34.966	19	33	0.249	27	41	11.8	0.154
L.fragilis_39	2018	A	first	98	34.33	17	31	0.228	24	38	10.7	0.133
L.fragilis_39	2018	B	first	98	34.695	17	31	0.23	24	38	12.7	0.163
L.fragilis_40	2018	A	first	81	NA	16	30	0.35	24	38	13.1	0.206
L.fragilis_40	2018	B	first	81	NA	16	30	0.414	24	38	13.5	0.24
L.fragilis_41	2018	A	first	80	41.573	17	31	0.306	24	38	12.4	0.169
L.fragilis_41	2018	B	first	80	31.818	17	31	0.226	24	38	11.5	0.138
L.fragilis_42	2018	A	first	50	35.186	16	30	0.302	24	38	12	0.189
L.fragilis_42	2018	B	first	50	41.544	18	32	0.33	21	35	12.6	0.202
L.fragilis_43	2018	A	first	55	40.225	18	32	0.348	24	38	12.9	0.22
L.fragilis_43	2018	B	first	55	42.743	20	34	0.348	30	44	11.9	0.187
L.fragilis_44	2018	A	first	117	41.321	19	33	0.33	27	41	11.5	0.191
L.fragilis_44	2018	B	first	117	37.896	20	34	0.317	27	41	12.1	0.201
L.fragilis_03	2017	A	third	88	42.07	16	34	0.423	21	39	12.9	0.274
L.fragilis_03	2017	B	third	86	38.008	20	38	0.3	30	48	11.7	0.171
L.fragilis_04	2017	A	third	91	38.369	17	35	0.306	30	48	12.9	0.285
L.fragilis_04	2017	B	third	89	33.781	17	35	0.449	30	48	11.1	0.162
L.fragilis_06	2017	A	third	118	40.37	17	35	0.466	22	40	12.6	0.292
L.fragilis_06	2017	B	third	116	42.531	19	37	0.407	24	42	12.8	0.27
L.fragilis_08	2017	A	third	106	42.124	16	34	0.363	21	39	12.7	0.215
L.fragilis_08	2017	B	third	104	38.574	16	34	0.362	21	39	11.8	0.226
L.fragilis_10	2017	A	third	57	33.18	24	42	0.236	29	47	10.7	0.165
L.fragilis_10	2017	B	third	55	33.629	28	46	0.228	NA	NA	NA	NA
L.fragilis_12	2017	A	third	85	36.155	25	43	0.255	32	50	11.1	0.168
L.fragilis_15	2017	A	third	37	35.63	18	36	0.255	NA	NA	NA	NA
L.fragilis_15	2017	B	third	35	30.688	21	39		NA	NA	NA	NA
L.fragilis_16	2017	A	third	107	37.551	19	37	0.277	26	44	11.3	0.163
L.fragilis_16	2017	B	third	105	37.179	20	38	0.271	27	45	11.5	0.192
L.fragilis_17	2017	A	third	81	33.296	20	38	0.194	26	44	10.6	0.136
L.fragilis_17	2017	B	third	81	31.301	19	37	0.226	NA	NA	NA	NA
L.fragilis_18	2017	A	third	77	36.758	18	36	0.261	26	44	10.9	0.14
L.fragilis_18	2017	B	third	75	42.884	22	40	0.323	26	44	11.5	0.205
L.fragilis_19	2017	A	third	75	34.377	16	34	0.237	23	41	10.02	0.154
L.fragilis_19	2017	B	third	73	35.629	16	34	0.254	25	43	10.5	0.143
L.fragilis_20	2017	A	third	67	35.883	17	35	0.28	24	42	12.4	0.212
L.fragilis_20	2017	B	third	65	35.231	19	37	0.219	24	42	10	0.115
L.fragilis_21	2017	A	third	65	35.621	19	37	0.26	26	44	11.7	0.177
L.fragilis_21	2017	B	third	63	32.913	25	43	0.23	33	51	9.8	NA
L.fragilis_22	2017	A	third	65	32.99	19	37	0.208	25	43	11	0.135
L.fragilis_22	2017	B	third	63	37.177	19	37	0.312	27	45	NA	NA
L.fragilis_23	2017	A	third	77	35.213	18	36	0.231	25	43	11.3	0.153
L.fragilis_23	2017	B	third	75	40.801	23	41	0.328	32	50	11.8	NA
L.fragilis_24	2017	A	third	35	35.315	19	37	0.281	25	43	NA	NA
L.fragilis_24	2017	B	third	42	43.448	19	37	0.386	25	43	NA	NA
L.fragilis_26	2017	A	third	93	40.134	16	34	0.319	22	40	11.1	0.157
L.fragilis_28	2017	A	third	120	39.697	16	34	0.351	22	40	12.5	0.245
L.fragilis_28	2017	B	third	85	40.45	16	34	0.377	26	44	12.7	0.264
L.fragilis_30	2017	A	third	108	39.099	16	34	0.285	24	42	12.2	NA
L.fragilis_30	2017	B	third	101	39.909	16	34	0.378	NA	NA	NA	NA
L.fragilis_37	2017	A	third	59	41.093	16	34	0.365	24	42	11.9	0.186
L.fragilis_37	2017	B	third	72	38.506	16	34	0.33	NA	NA	NA	NA
L.fragilis_38	2017	A	third	87	40.901	17	35	0.372	NA	NA	NA	NA
